# Supplementary material for: Stress-responsive hydroxycinnamate glycosyltransferase modulates phenylpropanoid metabolism in Populus
Source: PubMed Central journal article supplement (PMC4112628; doi:10.1093/jxb/eru192), 2014-05-06
Supplement: supp_eru192_jexbot112201_file001.pdf [file supp_eru192_jexbot112201_file001.pdf]

**Table S1.** Primer information

| <b>Gene</b>                     | <b>Forward and reverse primers</b>                                          | <b>Purpose</b>                 |
|---------------------------------|-----------------------------------------------------------------------------|--------------------------------|
| GT1-316                         | F: <u>GGATCC</u> CTGGTTTCCGAGTCTCTTGG<br>R: <u>CCCGGG</u> TCATGCCGATGACCCAC | recombinant protein expression |
| GT1-316                         | F: ATGGTTTCCGAGTCTCTTGG<br>R: TCATGCCGATGACCCAC                             | binary vector construction     |
| GT1-315/316 cluster             | F: CCTAAGGCAGTGGAAATGAAGSAG<br>R: CCAGTTCADCSACTTYCTCRHTGG                  | qRT-PCR                        |
| PAL1                            | F: ATGTCTTTGCTTACGCCGATGACC<br>R: TCATATGCTGCTCTTGCGCTCTCA                  | qRT-PCR                        |
| PAL2                            | F: AGAGAGTCCTGACAAATGGGCTTCA<br>R: GYTGGGTTGCCRTTCTCAAKTTCA                 | qRT-PCR                        |
| 4CL1                            | F: TAGTGAAATCAGAAAAGTCTCAGG<br>R: CGCAAGTATTAAAGAAATAAGACAG                 | qRT-PCR                        |
| 4CL2                            | F: TATTCCCAAATCGGCTTCTGG<br>R: GGCAAGCTTGGCTCTCAGGTC                        | qRT-PCR                        |
| CCoAOMT1                        | F: RCCRATGAGGAAGTATGTGAGGTA<br>R: CAGATAAYAATAYTGGCAGGTCCC                  | qRT-PCR                        |
| CCoAOMT2                        | F: RCCRATGAGGAAGTATGTGAGGTA<br>R: TATAATATHGGCAGRGAATGCAGCCC                | qRT-PCR                        |
| elongation factor 1- $\beta$    | F: GACCTKGTATCAGTGGATTCCCTC<br>R: GAACAGAGGCACAAGATTACCAGG                  | qRT-PCR                        |
| $\alpha$ -tubulin 4             | F: CTTGCAATAGMATTTCATCTGGGAAATGGT<br>R: CTTCAAATACGAAGACAGACATAGTCTTG       | qRT-PCR                        |
| ubiquitin-conjugating enzyme E2 | F: CTGAAGAAGGAGATGACARCMCCA<br>R: GCATCCCTTCAACACAGTTTCAMG                  | qRT-PCR                        |

**Supplemental Table 2.** Characteristics of PfaGT1-316 glycosylation products confirmed by HPLC-MS/TOF.

| Product name (substrate)                                 | RT (min) | detected <i>m/z</i> | ion                      | expected <i>m/z</i> | $\Delta$ mass (ppm) | Product UV/Vis max         | Substrate UV/Vis max           | Molecular formula |
|----------------------------------------------------------|----------|---------------------|--------------------------|---------------------|---------------------|----------------------------|--------------------------------|-------------------|
| caffeoyl-glucose (caffeic acid)                          | 2.50     | 341.0865            | [M-H] <sup>-</sup>       | 341.0873            | -2.35               | 335, 212, 300              | 323, 218, 294-ish, 235-240-ish | C15H18O9          |
| 2-coumaroyl-glucose (2-coumaric acid)                    | 3.94     | 325.0934            | [M-H] <sup>-</sup>       | 325.0923            | 3.38                | 281, 330, 229, 218-ish     | 276, 324, 216                  | C15H18O8          |
| 4-coumaroyl-glucose (4-coumaric acid)                    | 3.11     | 325.0929            | [M-H] <sup>-</sup>       | 325.0923            | 1.85                | 315, 228, 296-ish, 210-ish | 310, 225, 290-ish, 212-ish     | C15H18O8          |
| 4-hydroxybenzoyl-glucose (4-hydroxybenzoic acid)         | 1.73     | 299.0764            | [M-H] <sup>-</sup>       | 299.0767            | -1.00               | 260, 210                   | 256, 210-ish                   | C13H16O8          |
| sinapoyl-glucose (sinapic acid)                          | 3.47     | 385.1126            | [M-H] <sup>-</sup>       | 385.1135            | -2.34               | 331, 225, 240-ish          | 324, 225, 235-ish              | C17H22O10         |
| feruloyl-glucose (ferulic acid)                          | 3.42     | 355.1042            | [M-H] <sup>-</sup>       | 355.1029            | 3.66                | 330, 220, 295-ish, 240-ish | 322, 219, 295-ish, 232-ish     | C16H20O9          |
| cinnamoyl-glucose (cinnamic acid)                        | 4.95     | 355.1043            | [M+CHOOH-H] <sup>-</sup> | 355.1029            | 3.94                | 282                        | 277, 218                       | C15H18O7          |
| benzoyl-glucose (benzoic acid)                           | 3.45     | 329.0888            | [M+CHOOH-H] <sup>-</sup> | 329.0873            | 4.56                | 232, 276                   | 228, 273                       | C13H16O7          |
| naringenin glucoside* (naringenin)                       | 5.58     | 433.1134            | [M-H] <sup>-</sup>       | 433.1135            | -0.23               | 284, 223, 332-ish          | 288, 222, 327-ish              | C21H22O10         |
| 4-hydroxybenzaldehyde glucoside* (4-hydroxybenzaldehyde) | 1.79     | 329.0890            | [M+CHOOH-H] <sup>-</sup> | 329.0873            | 5.17                | 265, 213, 220-ish, 280-ish | 283, 220, 200, 268-ish         | C13H16O7          |
| kaempferol glucoside* (kaempferol)                       | 5.54     | 447.0951            | [M-H] <sup>-</sup>       | 447.0927            | 5.37                | 364, 263, 249-ish, 315-ish | 363, 265, 320-ish, 300-ish     | C21H20O11         |

\* The exact identity (the natural of the glycosidic linkage) of these metabolites was not verified.

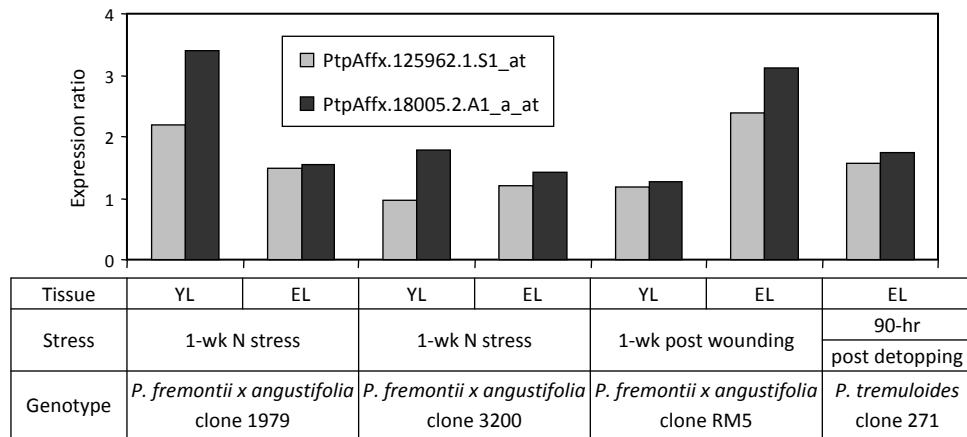

**Fig. S1.** Expression response of two *GT1-315/316* probe-sets to various stress treatments in multiple *Populus* genotypes. Expression ratio of stressed-to-unstressed samples was calculated using MASS-processed Affymetrix microarrays, based on the mean of two biological replicates. YL, young leaves; EL, expanding leaves.

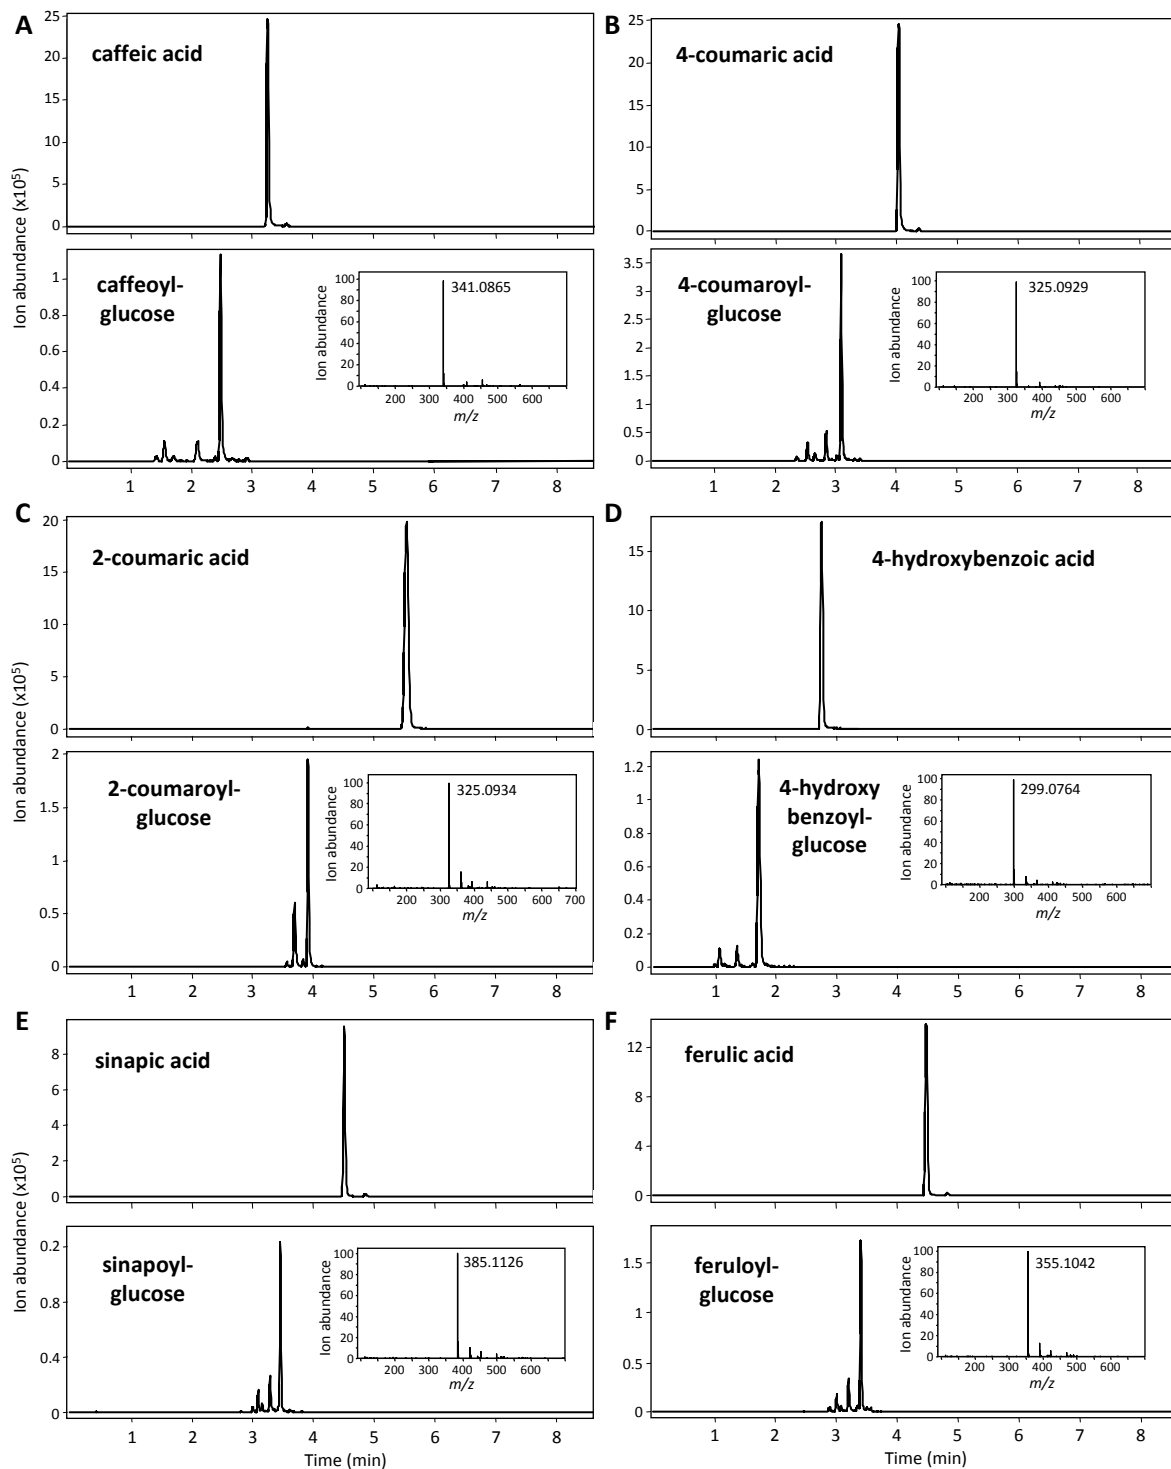

**Fig. S2.** HPLC-MS/TOF confirmation of PfaGT1-316 enzyme assay products. Extracted ion chromatograms for the substrate aglycone (top), glycosylation product (bottom) and mass spectra of the product (inset) are shown for (A) caffeic acid, (B) 4-coumaric acid, (C) 2-coumaric acid, (D) 4-hydroxybenzoic acid, (E) sinapic acid, (F) ferulic acid, (G) cinnamic acid, (H) benzoic acid, (I) naringenin, (J) 4-hydroxybenzaldehyde, (K) kaempferol. For each substrate there was one major product peak.

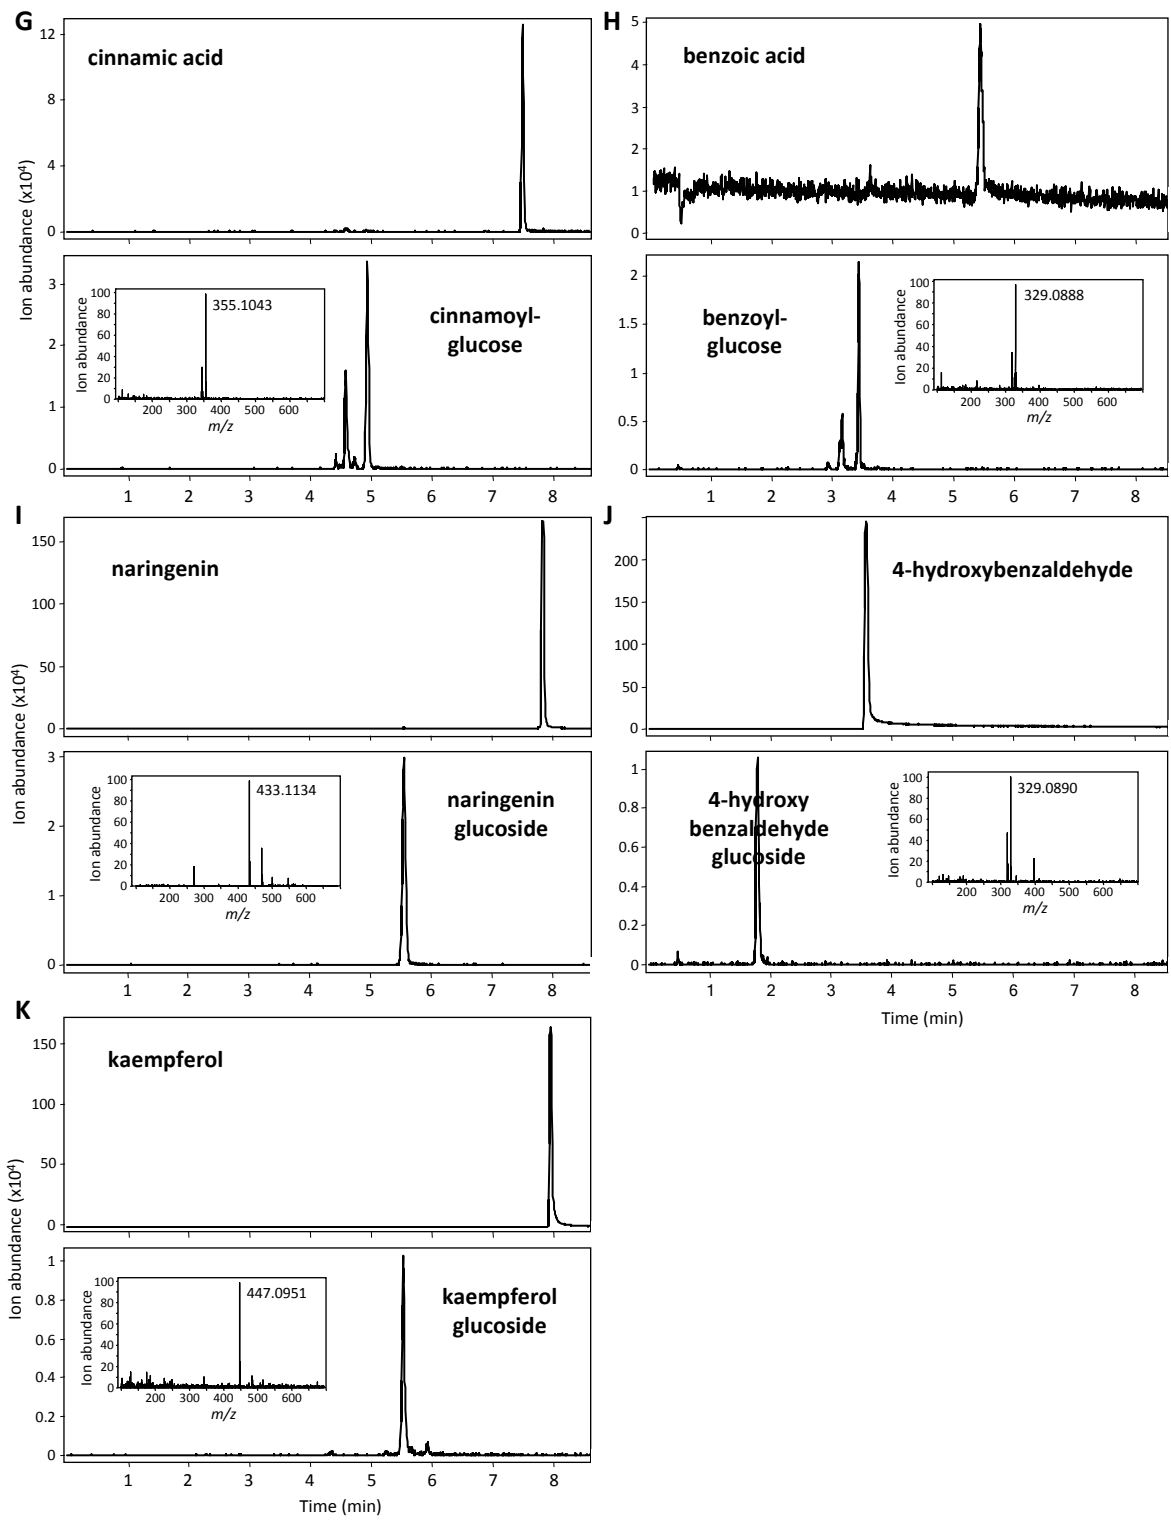

Fig. S2. (continued).

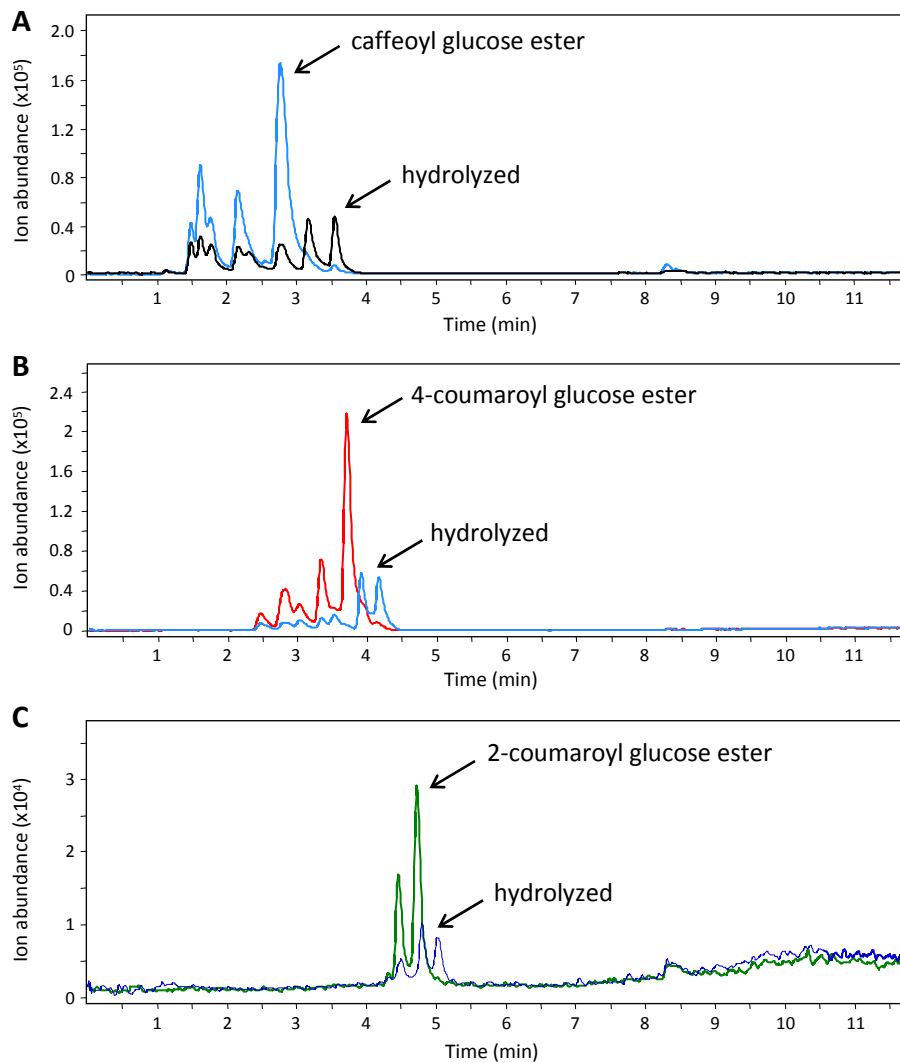

**Fig. S3.** Alkaline hydrolysis of PfaGT1-316 assay products to confirm glucose-ester linkage. Extracted ion chromatograms are shown for the major ion of glycosylation products of (A) caffeic acid, (B) 4-coumaric acid, and (C) 2-coumaric acid, with NaOH-hydrolyzed product chromatograms overlaid. Since the NaOH treatment cleaves only glucose ester, but not *O*-glucoside bonds, the digestibility of the PfaGT1-316 products strongly suggests that PfaGT1-316 catalyzes the formation of phenolic glucose esters, rather than phenolic *O*-glucosides.

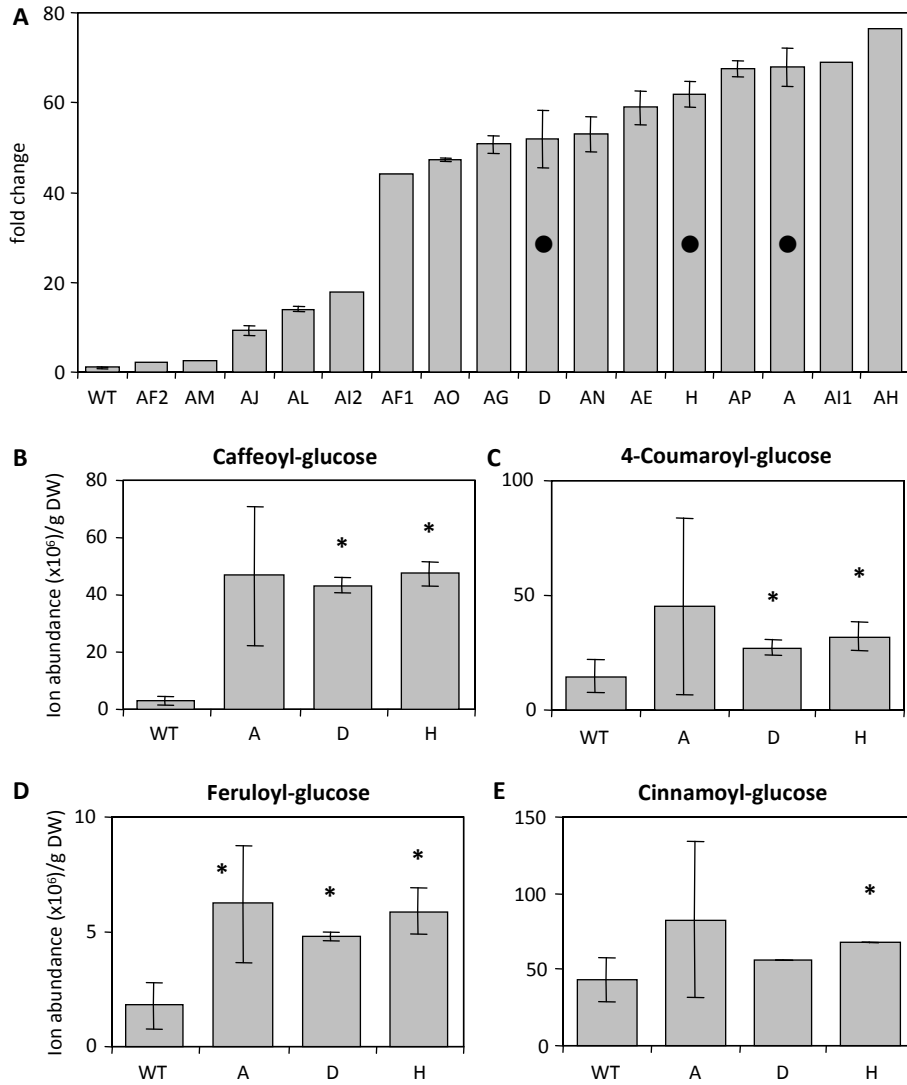

**Fig. S4.** Screening of independent *GT1-316* transgenic lines. (A) qRT-PCR analysis of *GT1-315/316* transcript abundance in leaves (LPI-5) of WT and 16 independent primary transformants ( $n = 2$  where error bars are shown). Lines marked with dots were selected for further analysis. (B) to (E), HPLC-MS/TOF analysis of caffeoyl- (B), 4-coumaroyl- (C), feruloyl- (D) and cinnamoyl-glucose esters (E) in WT and three transgenic lines. Statistical significance ( $P < 0.05$ ) is marked by asterisks.

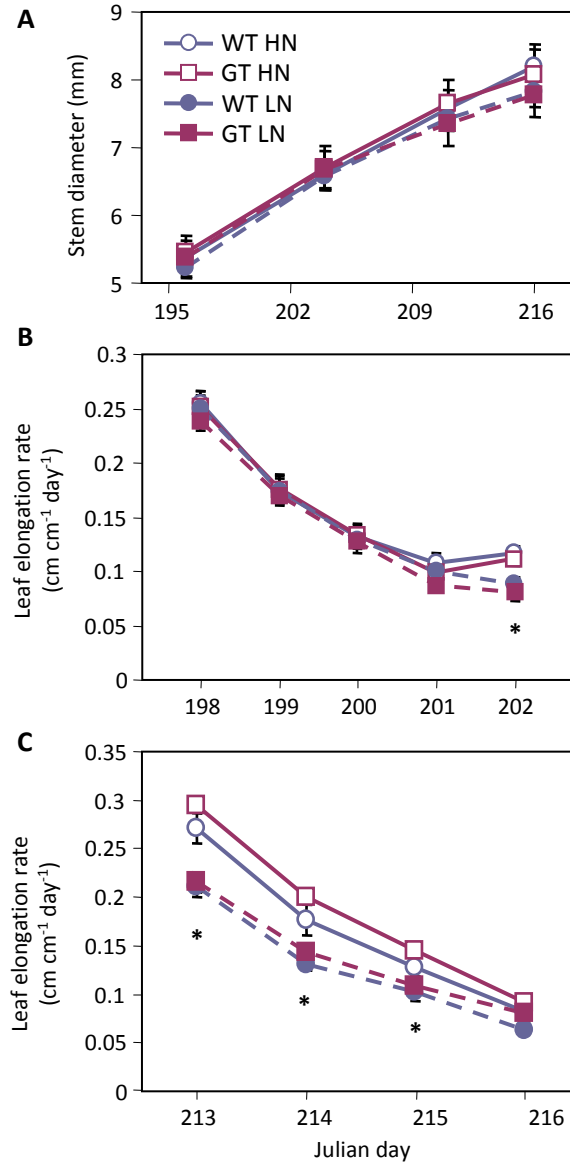

**Fig. S5.** Additional growth data. (A) Stem diameter and (B)-(C) leaf elongation rate at the onset (B) and after two weeks (C) of low-N treatments in WT and PfaGT1-316 over-expressing transgenic (GT) plants. Data represent means and standard errors of  $n=15$  in (A) and  $n=5-6$  in (B) and (C). N treatment effects are indicated by asterisks ( $P < 0.05$ ).



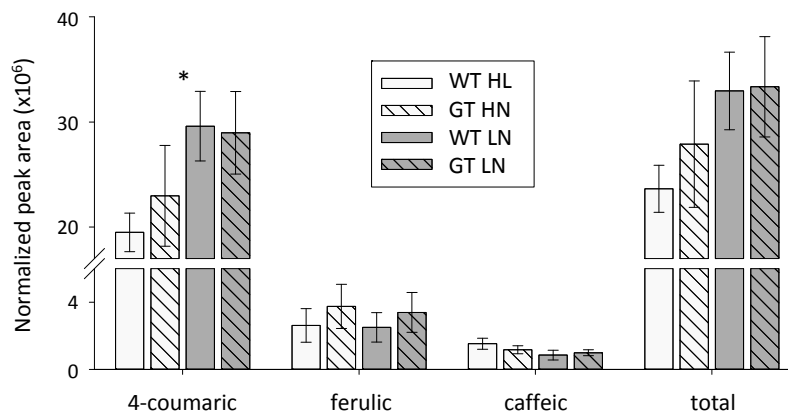

**Fig. S6.** Analysis of wall-bound phenolics in xylem of WT and transgenic *Populus* grown under different N regimes. There was no statistically significant transgenic effect. N treatment effects were indicated by an asterisk ( $P < 0.05$ ).

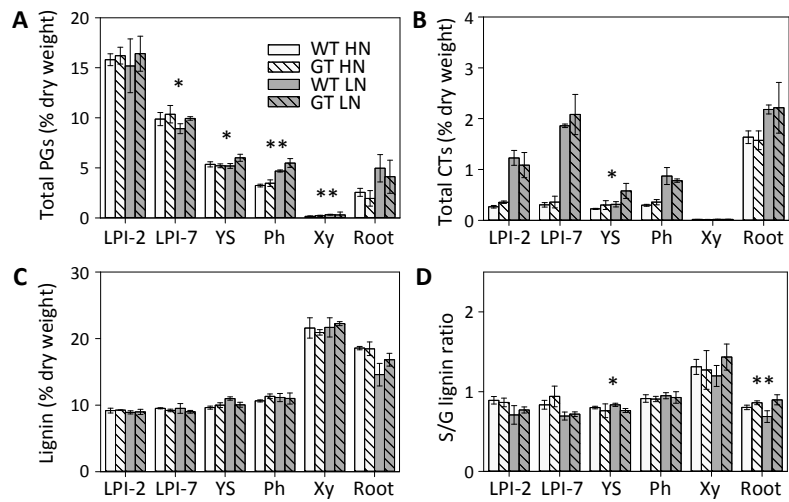

**Fig. S7.** Effects of PfaGT1-316 over-expression on major phenylpropanoid products. Shown are (A) phenolic glycoside (PG), (B), condensed tannin (CT), and (C) lignin content, and (D) S/G lignin ratio. Bars indicate means  $\pm$  SE (n=3). Asterisks indicate significant genotypic differences from two way ANOVA (genotype  $\times$  N treatment); \*  $P < 0.1$ ; \*\*  $P < 0.05$ .

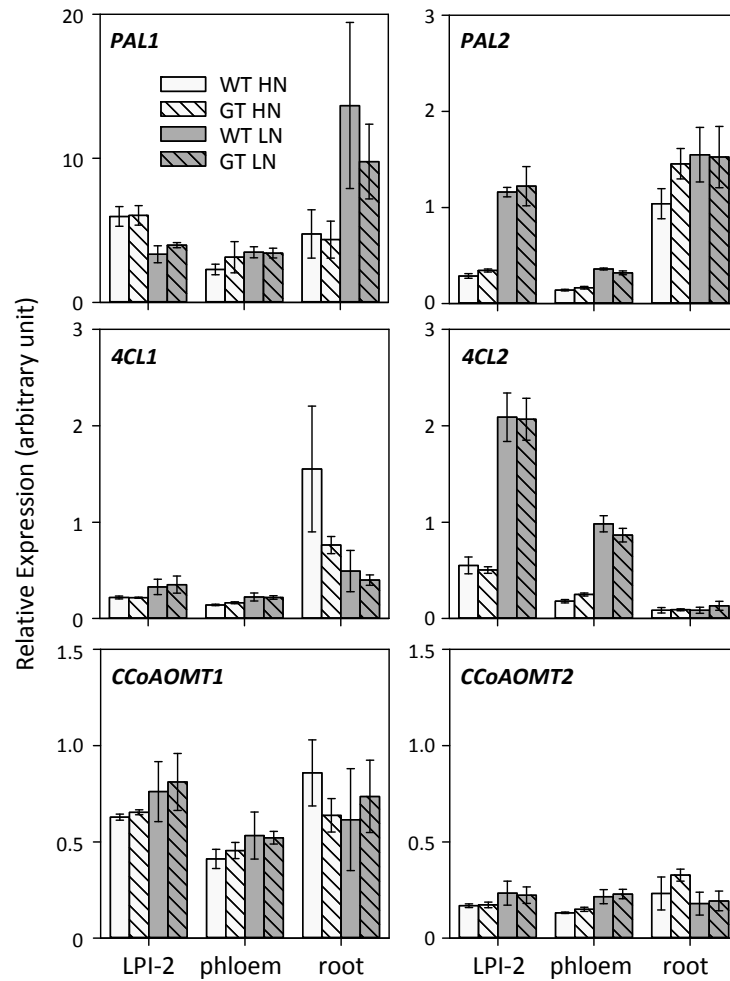

**Fig. S8.** Relative transcript abundance of representative phenylpropanoid pathway genes in WT and transgenic *Populus* grown under different N regimes. Two isoforms each for PAL (phenylalanine ammonia lyase), 4CL (4-coumarate:CoA ligase) and CCoAOMT (caffeoyl-CoA 3-O-methyltransferase) were analyzed. Numbering of isoforms is based on Tsai *et al.* (2006).

Tsai CJ, Harding SA, Tschaplinski TJ, Lindroth RL, Yuan Y. 2006. Genome-wide analysis of the structural genes regulating defense phenylpropanoid metabolism in *Populus*. *New Phytologist* 172, 47-62.
